# Supplementary figures and images for: Prognostic Value of GIMAP4 and Its Role in Promoting Immune Cell Infiltration into Tumor Microenvironment of Lung Adenocarcinoma
Source: Hindawi journal article supplement (doi:10.1155/2022/7440189), 2022-01-01

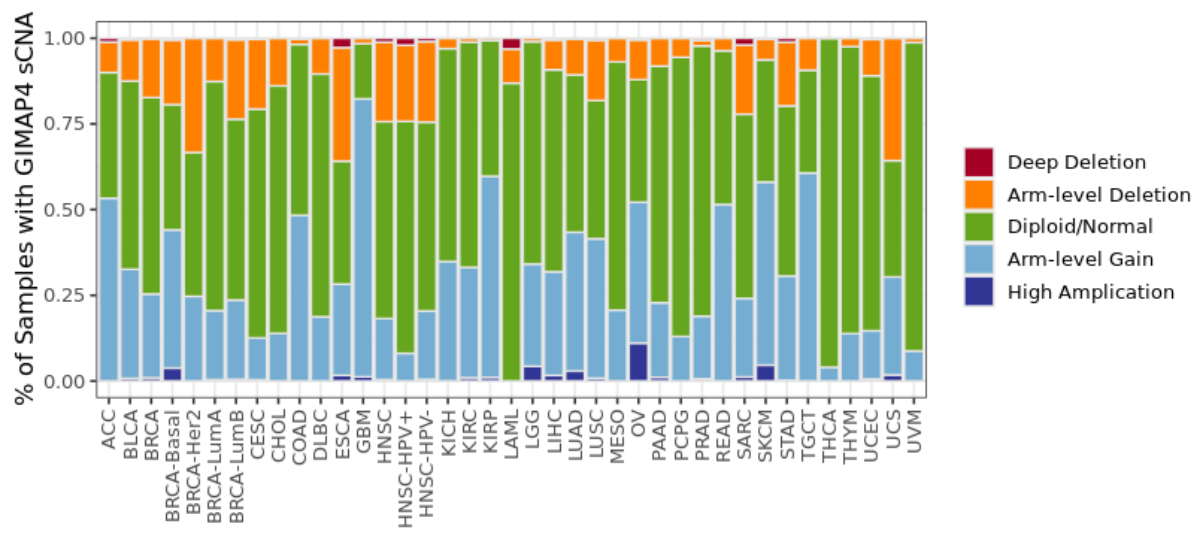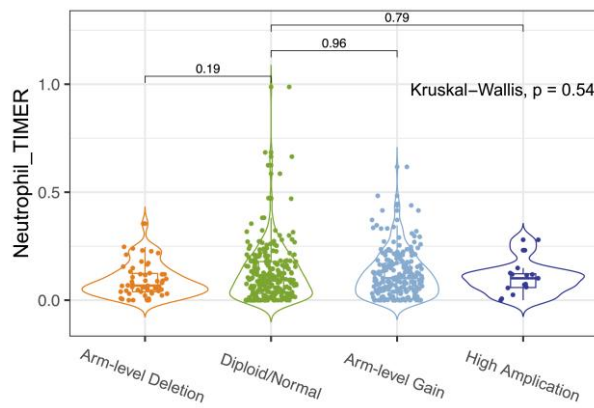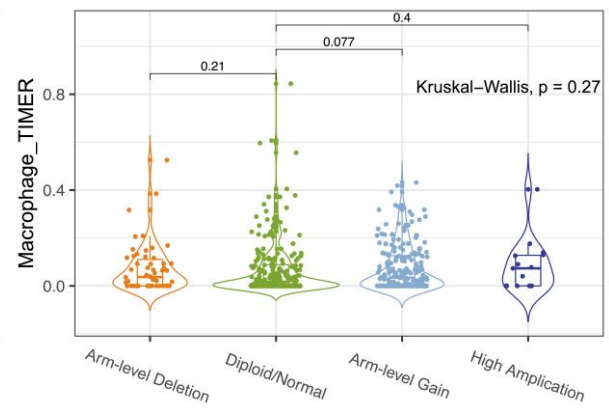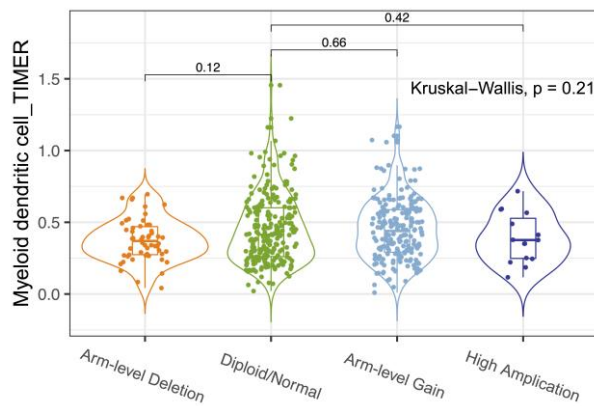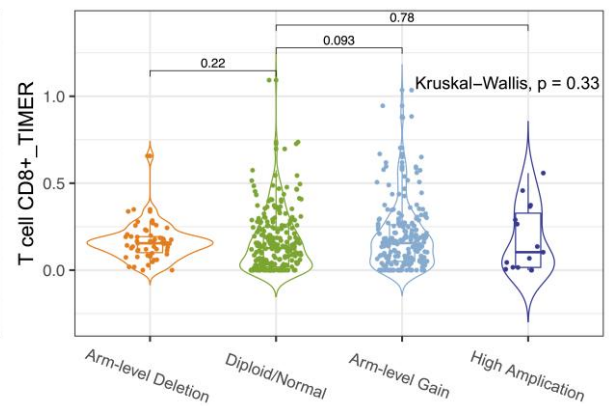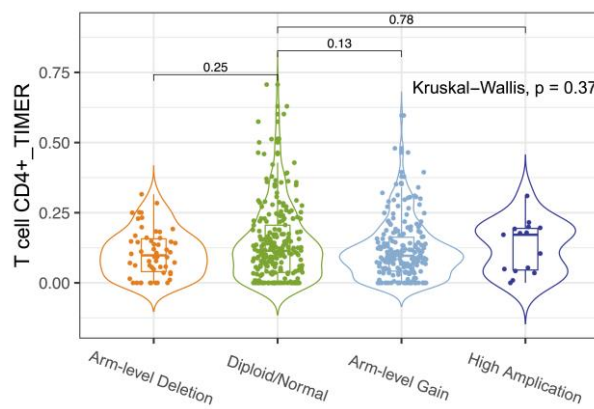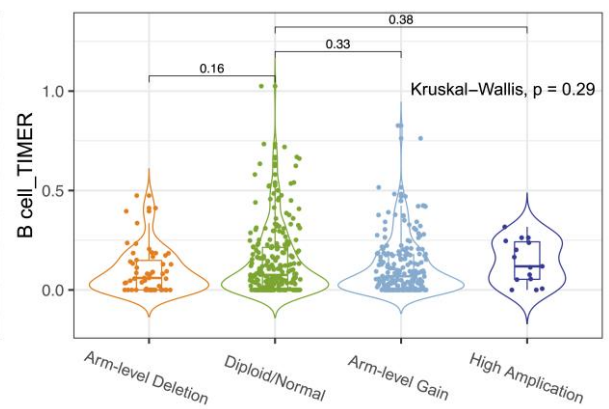

Supplement: f1 [file 7440189.f1.zip]

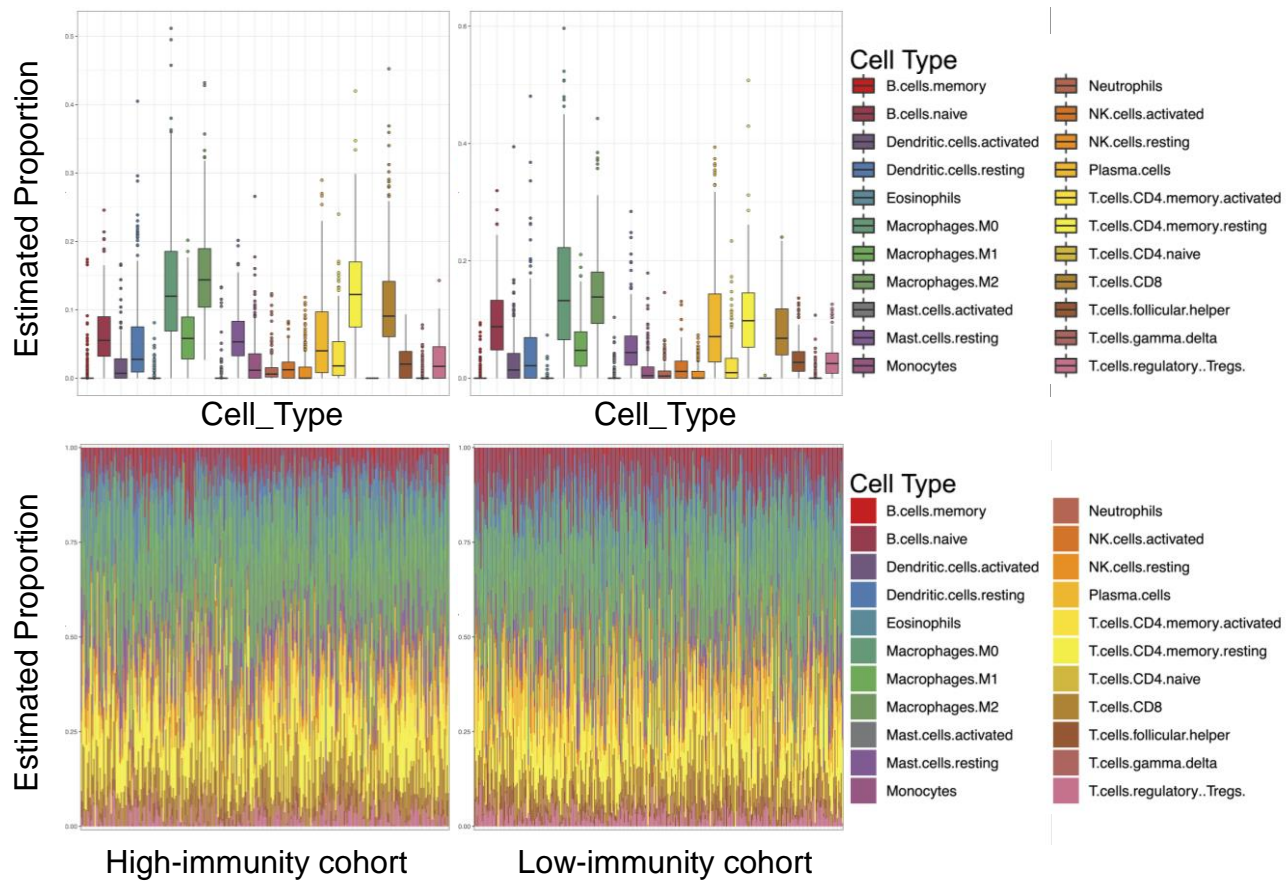

Supplement: f1 [file 7440189.f1.zip]
